# Supplementary material for: Genome-Wide Association of Implantable Cardioverter-Defibrillator Activation With Life-Threatening Arrhythmias
Source: PubMed Central journal article supplement (PMC3256134; doi:10.1371/journal.pone.0025387), 2012-01-11
Supplement: pone.0025387.s007.pdf [file pone.0025387.s007.pdf]

## Appendix A: Enrolling Center List

| Clinic                | Physician |
|-----------------------|-----------|
| Amarillo              | Abdallah  |
| Arkansas              | Norris    |
| Baylor                | Kowal     |
| Baylor-Plano          | DeVille   |
| Cardio Consultants    | Hodgkin   |
| Central Coast         | Grogin    |
| Chattanooga           | Bruce     |
| Desert Cardio         | Rubin     |
| Eastlake              | Sayar     |
| Emory                 | Langberg  |
| Glendale              | McKenzie  |
| Hall-Garcia           | Massumi   |
| Harris                | McBride   |
| Heart Center Florida  | Sayad     |
| Heart Clinic Arkansas | Chakka    |
| Huntington            | Maccaro   |
| Indiana Heart         | Genovely  |
| Inland                | Alaeddini |
| Krannert              | Das       |
| Lindner               | Kereiakes |
| Louisville            | Imburgia  |
| Mid America           | Ramza     |
| NorthShore            | Jadoneth  |
| Richmond              | Han       |
| Scripps               | Rogers    |
| South Carolina        | Gottipaty |
| Spokane               | Goldberg  |
| St Paul Heart         | Adler     |
| Stern                 | Mc Grew   |
| Texas                 | Canby     |
| U of KS               | Emert     |
| U of Washington       | Rho       |
| Umass                 | Rosenthal |
| Willowbrook           | Nasir     |
